# Supplementary material
Source: Elsevier journal article supplement (https://lshtm-eprints-repo-prod.lshtm-eprints.cdl.cosector.com/2026642/1/mmc1.pdf)
Supplement: mmc1 [file mmc1.pdf]

## APPENDIX A: School related questions in 14 year questionnaire

### Section A: About you and your school

A1. These questions ask about how you feel about going to school and what it's like being there:

| My school is a place where...                    | Strongly Agree | Agree | Disagree | Strongly Disagree | Don't Know |
|--------------------------------------------------|----------------|-------|----------|-------------------|------------|
| ↓                                                |                |       |          |                   |            |
| a) I really like to go each day                  |                |       |          |                   |            |
| b) I learn to get along with other people        |                |       |          |                   |            |
| c) Other pupils accept me as I am                |                |       |          |                   |            |
| d) I like to be                                  |                |       |          |                   |            |
| e) I like to do extra work                       |                |       |          |                   |            |
| f) I feel happy                                  |                |       |          |                   |            |
| g) I feel lonely                                 |                |       |          |                   |            |
| h) I feel proud to be a pupil                    |                |       |          |                   |            |
| i) I feel worried                                |                |       |          |                   |            |
| j) People trust me                               |                |       |          |                   |            |
| k) I have a lot of fun                           |                |       |          |                   |            |
| l) I enjoy what I do in class                    |                |       |          |                   |            |
| m) I can learn what I need to know               |                |       |          |                   |            |
| n) I get excited about the work we do            |                |       |          |                   |            |
| o) I get upset                                   |                |       |          |                   |            |
| p) I know people think a lot of me               |                |       |          |                   |            |
| q) I get on well with other pupils in my classes |                |       |          |                   |            |
| r) People can depend on me                       |                |       |          |                   |            |
| s) Other pupils are very friendly                |                |       |          |                   |            |
| t) I feel restless                               |                |       |          |                   |            |

A2 Again please tell us how much you agree or disagree with each of the following statements:

|                                                                                                                 | Strongly Agree | Agree | Disagree | Strongly Disagree |
|-----------------------------------------------------------------------------------------------------------------|----------------|-------|----------|-------------------|
| a) Most teachers in my school take action when they see anyone breaking the school rules                        |                |       |          |                   |
| b) Most teachers at my school make it clear how we should behave                                                |                |       |          |                   |
| c) Most of my teachers don't really listen to what I say in class                                               |                |       |          |                   |
| d) In this school, most teachers and pupils really trust one another                                            |                |       |          |                   |
| e) I get treated unfairly by most of my teachers                                                                |                |       |          |                   |
| f) Most of my teachers make sure we do any homework that is set                                                 |                |       |          |                   |
| g) Most of my teachers can keep order in class                                                                  |                |       |          |                   |
| h) People think my school is a good school                                                                      |                |       |          |                   |
| i) The work I do in lessons is interesting to me                                                                |                |       |          |                   |
| j) I like most of my teachers                                                                                   |                |       |          |                   |
| k) Most of my teachers treat everyone the same regardless of skin colour or cultural background                 |                |       |          |                   |
| l) Most of my teachers praise me when I do my school work well                                                  |                |       |          |                   |
| m) Most teachers at my school treat pupils with respect                                                         |                |       |          |                   |
| n) Most teachers at my school have given up on some of the pupils                                               |                |       |          |                   |
| o) Most teachers at my school believe that all pupils can learn                                                 |                |       |          |                   |
| p) If I get caught breaking school rules, I'm more likely to be punished than others                            |                |       |          |                   |
| q) Compared with other pupils in my classes, most of my teachers are more likely to take an interest in my work |                |       |          |                   |

A3. Next, please think about your school work:

|                                                                          | <b>Very good</b> | <b>Above average</b> | <b>Average</b> | <b>Below average</b> | <b>Not at all good</b> | <b>Don't know</b> |
|--------------------------------------------------------------------------|------------------|----------------------|----------------|----------------------|------------------------|-------------------|
| <b>a) How would you describe your schoolwork?</b>                        |                  |                      |                |                      |                        |                   |
| <b>b) How do you think your teachers would describe your schoolwork?</b> |                  |                      |                |                      |                        |                   |

## APPENDIX B

Factor analysis of the questionnaire items: only items with a rotated component loading of 0.6 or more are shown for each factor

| <b>RESPONDENT'S SCHOOL IS A PLACE WHERE...</b>                  | <b>CONNECTEDNESS TO<br/>SCHOOL/STUDENTS</b> | <b>ENJOYMENT OF<br/>SCHOOL</b> | <b>FAIR/CLEAR<br/>BOUNDARIES</b> |
|-----------------------------------------------------------------|---------------------------------------------|--------------------------------|----------------------------------|
| they get on well with other pupils in their class               | 0.861                                       |                                |                                  |
| other pupils accept them                                        | 0.752                                       |                                |                                  |
| other pupils are very friendly                                  | 0.734                                       |                                |                                  |
| people can depend on them                                       | 0.724                                       |                                |                                  |
| people trust them                                               | 0.688                                       |                                |                                  |
| they know people who think a lot of me                          | 0.665                                       |                                |                                  |
| they have a lot of fun                                          | 0.606                                       |                                |                                  |
| they really like to go each day                                 |                                             | 0.721                          |                                  |
| they get excited about the work they do                         |                                             | 0.702                          |                                  |
| they enjoy what they do in class                                |                                             | 0.690                          |                                  |
| teachers make it clear how they should behave                   |                                             |                                | 0.874                            |
| teachers take action when they see anyone breaking school rules |                                             |                                | 0.835                            |
| teachers keep the class in order                                |                                             |                                | 0.721                            |
| teachers at school treats pupils with respect                   |                                             |                                | 0.718                            |
| teachers at school believe that all pupils can learn            |                                             |                                | 0.680                            |
| respondent makes sure that any homework set is completed        |                                             |                                | 0.633                            |
| teachers praise them when they do school work well              |                                             |                                | 0.628                            |

## Appendix C

Multivariable models examining association between school risk factors aged 14 and self-harm aged 16,<sup>1</sup> comparison of complete case analysis and imputed data analysis.

| Complete case analysis <sup>2</sup>            |                   |                   | Imputed data analysis (N=4742) |                   |                   |
|------------------------------------------------|-------------------|-------------------|--------------------------------|-------------------|-------------------|
| Model 1                                        | Model 2           | Model 3           | Model 1                        | Model 2           | Model 3           |
| <i>Get on well with other pupils</i><br>N=2476 |                   |                   | N=2441                         |                   |                   |
| Agree                                          | 1.00              | 1.00              | 1.00                           | 1.00              | 1.00              |
| Disagree                                       | 2.12 (1.39, 3.24) | 2.15 (1.38, 3.36) | 1.67 (1.00, 2.79)              | 2.53 (1.83, 3.48) | 1.97 (1.39, 2.80) |
| <i>p</i> value                                 | 0.001             | 0.001             | 0.05                           | <0.001            | <0.001            |
| <i>Others accept me as I am</i><br>N=2401      |                   |                   | N=2365                         |                   |                   |
| Agree                                          | 1.00              | 1.00              | 1.00                           | 1.00              | 1.00              |
| Disagree                                       | 2.61 (1.95, 3.50) | 2.58 (1.93, 3.44) | 2.05 (1.50, 2.82)              | 2.80 (2.25, 3.48) | 2.18 (1.72, 2.76) |
| <i>p</i> value                                 | <0.0001           | <0.001            | <0.001                         | <0.001            | <0.001            |
| <i>A place I like to go</i> N=2355<br>N=2355   |                   |                   | N=2322                         |                   |                   |
| Agree                                          | 1.00              | 1.00              | 1.00                           | 1.00              | 1.00              |
| Disagree                                       | 1.45 (1.15, 1.81) | 1.50 (1.18, 1.90) | 1.31 (1.02, 1.69)              | 1.43 (1.19, 1.72) | 1.23 (1.01, 1.49) |
| <i>p</i> value                                 | 0.001             | 0.001             | 0.038                          | <0.001            | 0.037             |
| <i>Excited about the work we do</i><br>N=2257  |                   |                   | N=2227                         |                   |                   |
| Agree                                          | 1.00              | 1.00              | 1.00                           | 1.00              | 1.00              |
| Disagree                                       | 1.25 (0.98, 1.59) | 1.22 (0.95, 1.57) | 1.10 (0.85, 1.43)              | 1.38 (1.12, 1.69) | 1.22 (0.98, 1.51) |
| <i>p</i> value                                 | 0.069             | 0.115             | 0.479                          | 0.002             | 0.76              |
| <i>Clear how we should behave</i><br>N=2513    |                   |                   | N=2475                         |                   |                   |
| Agree                                          | 1.00              | 1.00              | 1.00                           | 1.00              | 1.00              |
| Disagree                                       | 1.21 (0.82, 1.79) | 1.21 (0.80, 1.83) | 1.01 (0.65, 1.57)              | 1.62 (1.22, 2.15) | 1.36 (1.00, 1.84) |
| <i>p</i> value                                 | 0.344             | 0.357             | 0.954                          | 0.001             | 0.049             |
| <i>Teachers take action</i><br>N=2515          |                   |                   | N=2477                         |                   |                   |
| Agree                                          | 1.00              | 1.00              | 1.00                           | 1.00              | 1.00              |
| Disagree                                       | 2.07 (1.56, 2.75) | 1.91 (1.43, 2.56) | 1.58 (1.16, 2.15)              | 2.53 (1.83, 3.48) | 1.60 (1.26, 2.04) |
| <i>p</i> value                                 | <0.001            | <0.001            | 0.004                          | <0.001            | <i>p</i> <0.001   |

<sup>1</sup>Excluding participants who had self-harmed but not in the last year in all models

<sup>2</sup>Only participants with complete data for all variables included

Model 1: adjusted for sex and SEP

Model 2: adjusted for sex, SEP, own emotional health aged 13, and mother's mental health aged 11

Model 3: adjusted for sex, SEP, own emotional health aged 13, mother's mental health aged 11 and own mental health aged 16

## Appendix D

Table 3: Multinomial models examining association between school risk factors aged 14 and a) each type of self-harm compared to no self-harm b) self-harm with suicidal intent compared to self-harm without suicidal intent (NSSI)<sup>1,2</sup>

| Complete case analysis                       |                   |                   |                   | Imputed data analysis (N=4742) |                          |                   |                   |                           |
|----------------------------------------------|-------------------|-------------------|-------------------|--------------------------------|--------------------------|-------------------|-------------------|---------------------------|
| No self-harm as baseline                     |                   |                   | NSSI as baseline  | P value from omnibus test      | No self-harm as baseline |                   | NSSI as baseline  | P value from omnibus test |
| Variables                                    | Suicidal intent   | NSSI              | Suicidal intent   |                                | Suicidal intent          | NSSI              | Suicidal intent   |                           |
| <i>Get on well with other pupils N=2475</i>  |                   |                   |                   |                                |                          |                   |                   |                           |
| Agree                                        | 1.00              | 1.00              | 1.00              | 0.0019                         | 1.00                     | 1.00              | 1.00              | <0.0001                   |
| Disagree                                     | 2.61 (1.44, 4.71) | 1.87 (1.06, 3.28) | 1.40 (0.67, 2.90) |                                | 3.26 (2.15, 4.94)        | 1.88 (1.23, 2.89) | 1.73 (1.01, 2.96) |                           |
| <i>Others accept me as I am N=2400</i>       |                   |                   |                   |                                |                          |                   |                   |                           |
| Agree                                        | 1.00              | 1.00              | 1.00              | <0.0001                        | 1.00                     | 1.00              | 1.00              | <0.0001                   |
| Disagree                                     | 2.45 (1.60, 3.77) | 2.66 (1.90, 3.74) | 0.92 (0.56, 1.51) |                                | 3.00 (2.19, 4.11)        | 2.50 (1.92, 3.25) | 1.20 (0.82, 1.74) |                           |
| <i>A place I like to go N=2354</i>           |                   |                   |                   |                                |                          |                   |                   |                           |
| Agree                                        | 1.00              | 1.00              | 1.00              | 0.0033                         | 1.00                     | 1.00              | 1.00              | 0.0007                    |
| Disagree                                     | 1.43 (0.99, 2.08) | 1.54 (1.17, 2.04) | 0.93 (0.60, 1.44) |                                | 1.57 (1.20, 2.06)        | 1.30 (1.04, 1.64) | 1.21 (0.87, 1.68) |                           |
| <i>Excited by the work that we do N=2257</i> |                   |                   |                   |                                |                          |                   |                   |                           |
| Agree                                        | 1.00              | 1.00              | 1.00              | 0.2189                         | 1.00                     | 1.00              | 1.00              | 0.0143                    |
| Disagree                                     | 1.08 (0.74, 1.58) | 1.31 (0.97, 1.78) | 0.82 (0.52, 1.30) |                                | 0.98 (0.67, 1.44)        | 1.37 (1.06, 1.76) | 0.98 (0.67, 1.44) |                           |
| <i>Clear how we should behave N=2512</i>     |                   |                   |                   |                                |                          |                   |                   |                           |
| Agree                                        | 1.00              | 1.00              | 1.00              | 0.0252                         | 1.00                     | 1.00              | 1.00              | 0.0006                    |
| Disagree                                     | 1.95 (1.16, 3.29) | 0.80 (0.45, 1.43) | 2.43 (1.17, 5.02) |                                | 2.13 (1.45, 3.13)        | 1.26 (0.87, 1.84) | 1.68 (1.02, 2.79) |                           |
| <i>Teachers take action N=2514</i>           |                   |                   |                   |                                |                          |                   |                   |                           |
| Agree                                        | 1.00              | 1.00              | 1.00              | <0.0001                        | 1.00                     | 1.00              | 1.00              | <0.0001                   |
| Disagree                                     | 2.36 (1.56, 3.57) | 1.68 (1.14, 2.38) | 1.41 (0.85, 2.33) |                                | 2.42 (1.78, 3.29)        | 1.58 (1.18, 2.11) | 1.53 (1.04, 2.26) |                           |

<sup>1</sup>One participant left both questions blank concerning suicidal intent and was omitted from the analysis<sup>2</sup>Models adjusted for sex, SEP, own emotional health aged 13 and mother's mental health aged 11
